# Supplementary material for: Physiological effects of cerium oxide nanoparticles on the photosynthesis and water use efficiency of soybean (Glycine max (L.) Merr.)
Source: Royal Society of Chemistry journal article supplement (doi:10.1039/c7en00015d), 2017-01-01
Supplement: c7en00015d1.pdf [file c7en00015d1.pdf]

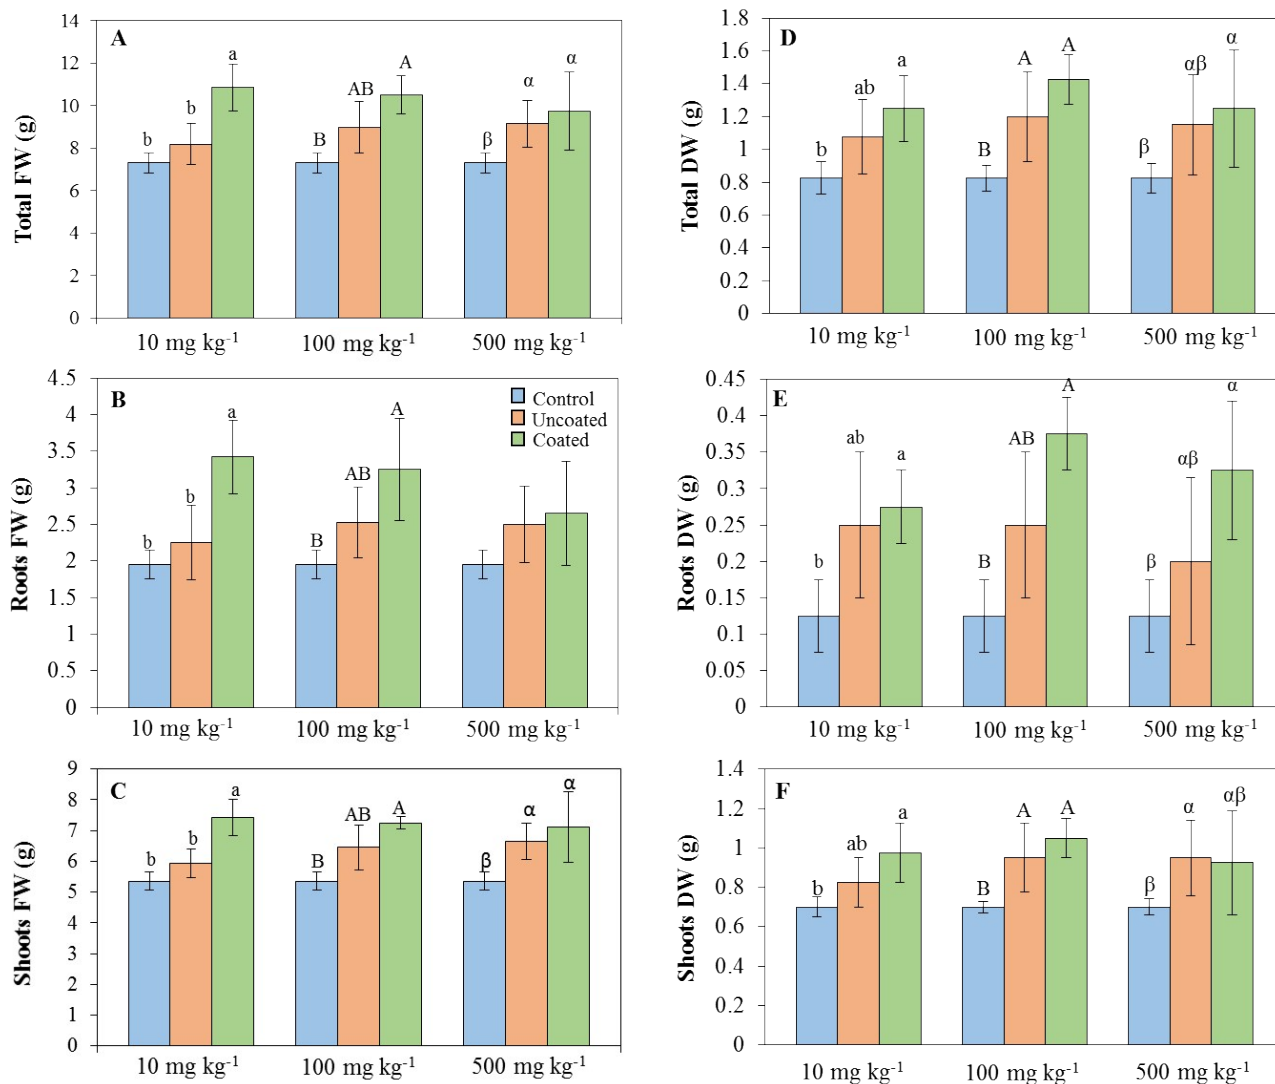

**Supplementary Figure S1.** (A) Total fresh weight, (B) fresh weight of roots, (C) fresh weight of shoots, (D) Total dry weight, (E) dry weight of roots, (F) dry weight of shoots of soybean plants subjected to 10, 100 and 500 mg kg<sup>-1</sup> CeO<sub>2</sub>NPs for three weeks. Values represent mean ± SD (n=6). Different letters within each NPs concentration indicate significant statistical differences (at  $p \leq 0.05$ ) according to one-way ANOVA followed by Tukey's test. Letters are only reported when differences among means are statistically significant.
